# Supplementary material for: Rotational dynamics of the organic bridging linkers in metal–organic frameworks and their substituent effects on the rotational energy barrier
Source: Royal Society of Chemistry journal article supplement (doi:10.1039/c9ra01288e), 2019-01-01
Supplement: c9ra01288e1.pdf [file c9ra01288e1.pdf]

# Supplementary Information

## Rotational Dynamics of the Organic Bridging Linkers in Metal-Organic Frameworks and Their Substituents Effects on Rotational Energy Barrier

**Srimanta Pakhira<sup>a\*</sup>**

<sup>a</sup>Discipline of Physics, Indian Institute of Technology Indore (IIT), Simrol, Khandwa Road, Indore,  
453552, MP, India. Telephone no.: +91-732-430-6830

\*Corresponding author's Email: [spakhira@iiti.ac.in](mailto:spakhira@iiti.ac.in) or [srimantacu@gmail.com](mailto:srimantacu@gmail.com)

ORCID Srimanta Pakhira: 0000-0002-2488-300X.

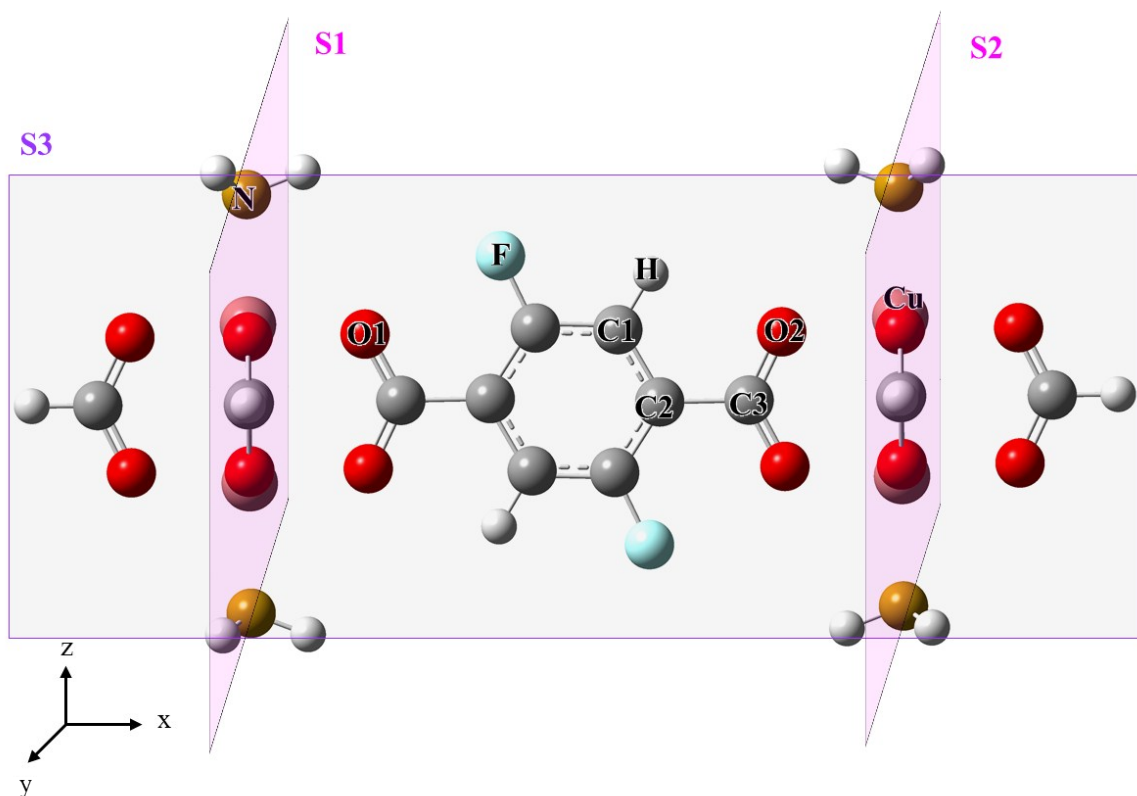

**Figure S1.** Optimized structure of the model  $[\text{Cu}_4(\text{DFBDC})(\text{HCO}_2)_6(\text{NH}_3)_4]$  MOF containing BFBDC linker (DFBDC = 2,5-difluoro-1,4-benzenedicarboxylate) (Top View). The dihedral angle  $\chi$  of the DFBDC organic bridging linker is represented by C1-C2-C3-O2. The atoms H, C, N, O, F and Cu were represented by the white, gray, light green, red, sky blue and black red colors respectively, and S1, S2 and S3 are the imaginary planes.

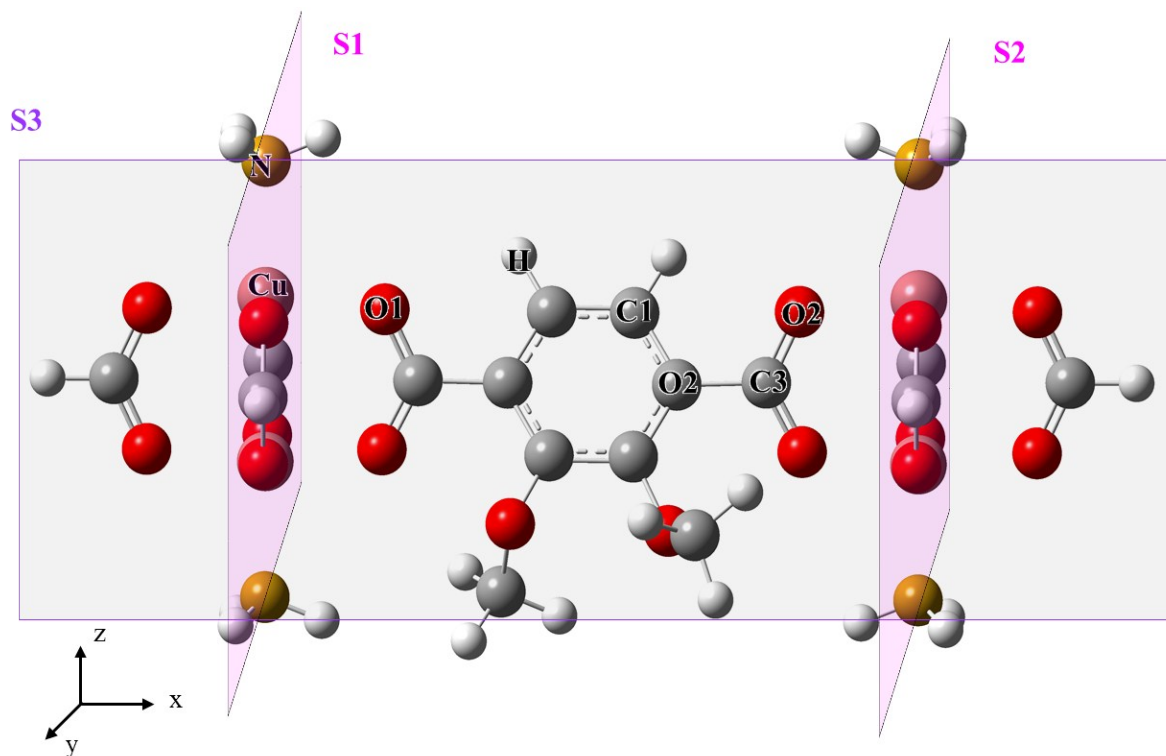

**Figure S2.** Optimized structure of the model  $[\text{Cu}_4(\text{DMBDC})(\text{HCO}_2)_6(\text{NH}_3)_4]$  MOF containing DMBDC linker (DMBDC = 2,3-dimethoxy-1,4-benzenedicarboxylate) (Top View).

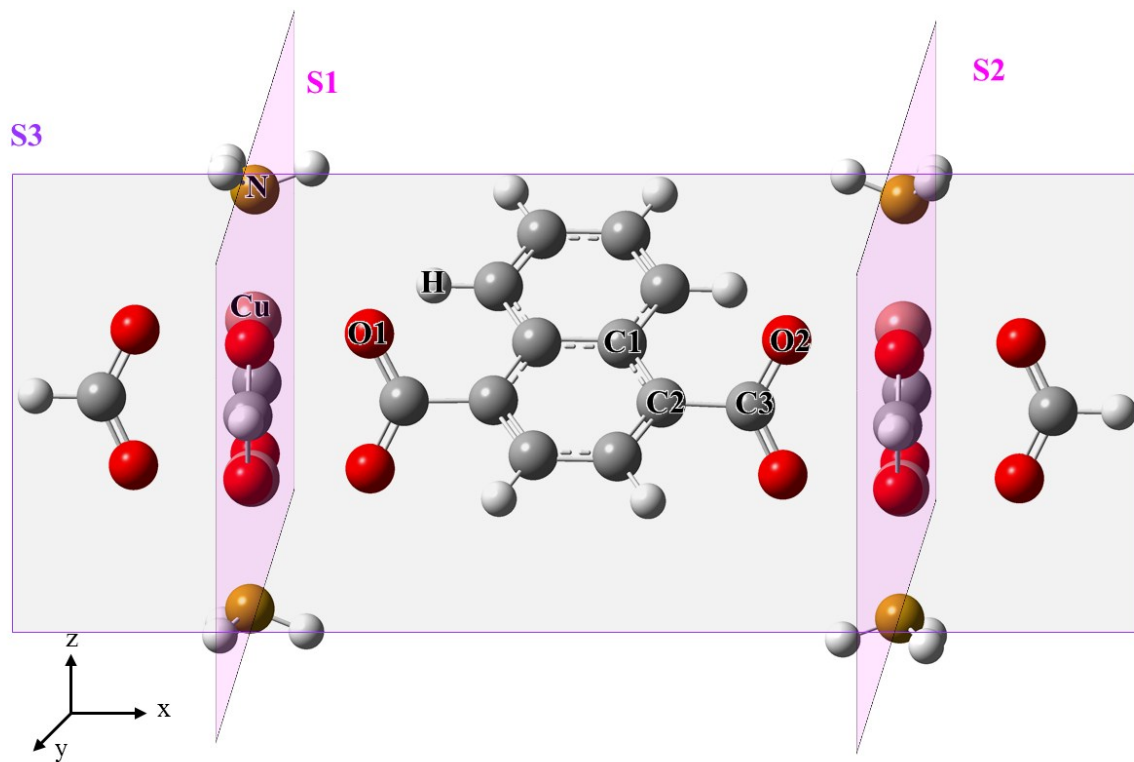

**Figure S3.** Optimized structure of the model  $[\text{Cu}_4(\text{NDC})(\text{HCO}_2)_6(\text{NH}_3)_4]$  MOF containing NDC (NDC = 1,4-naphthalenedicarboxylate) linker (Top View).

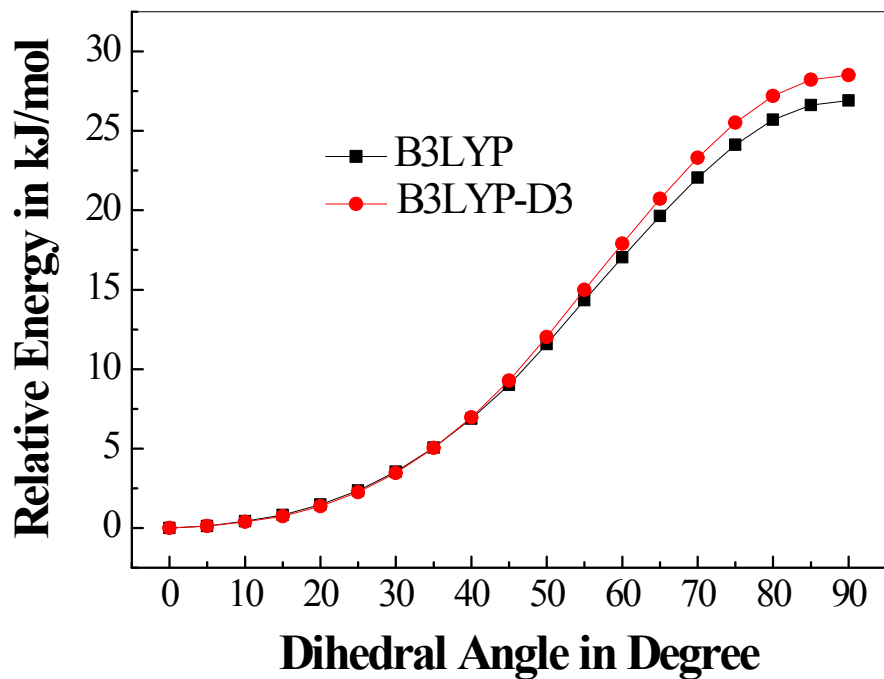

**Figure S4.** Potential energy curves (PECs) of the model  $[\text{Cu}_4(\text{DFBDC})(\text{HCO}_2)_6(\text{NH}_3)_4]$  MOF containing DFBDC.

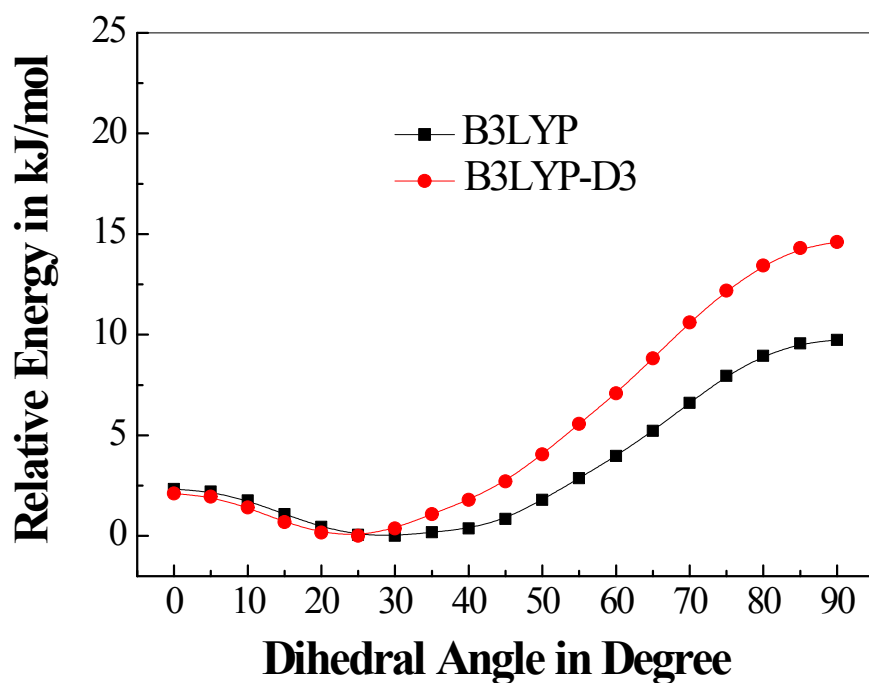

**Figure S5.** PECs of the model  $[\text{Cu}_4(\text{DMBDC})(\text{HCO}_2)_6(\text{NH}_3)_4]$  MOF containing DMBDC linker.

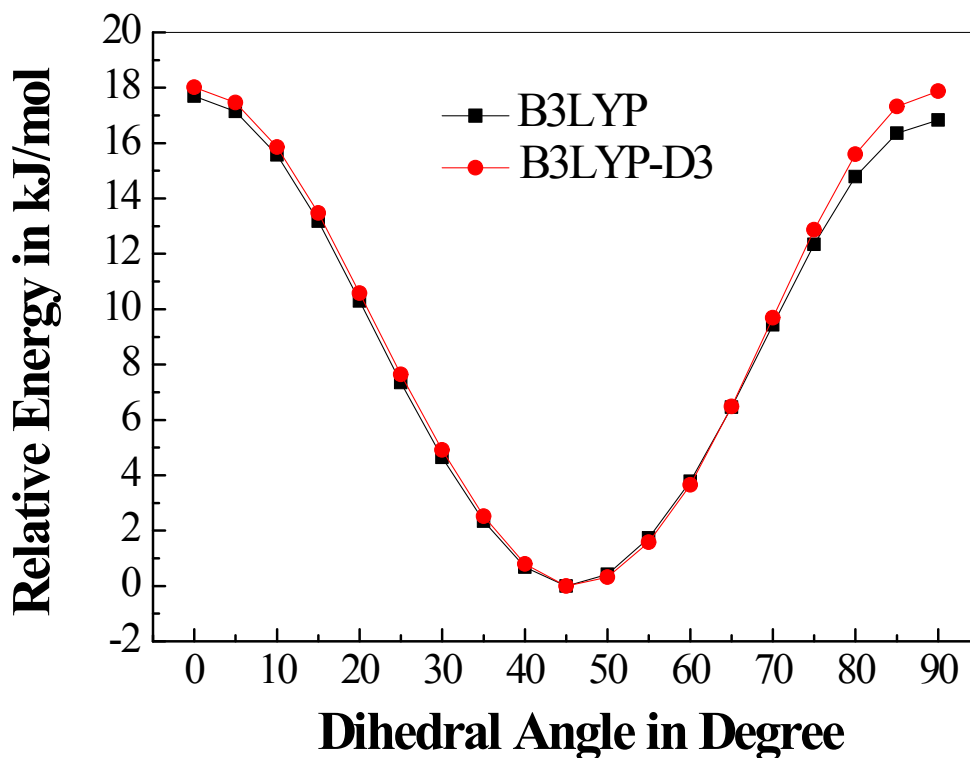

**Figure S6.** PECs of the model  $[\text{Cu}_4(\text{NDC})(\text{HCO}_2)_6(\text{NH}_3)_4]$  MOF containing NDC linker.

### Force Field Parameters of the Model $[\text{Cu}_4(\text{BDC})(\text{HCO}_2)_6(\text{NH}_3)_4]$ MOF with BDC Linker:

The force field parameters were computed by introducing DFT-D methods of the model  $[\text{Cu}_2(\text{X})_2\text{DABCO}]$  MOF considering BDC linker and  $\text{Cu}^{2+}$  followed by equation below:

$$\begin{aligned}
 V_{\text{AMBER}} = & \sum_i^{n_{\text{bonds}}} b_i (r_i - r_{i,\text{eq}})^2 + \sum_i^{n_{\text{angles}}} a_i (\theta_i - \theta_{i,\text{eq}})^2 + \sum_i^{n_{\text{dihedrals}}} \sum_n^{n_{i,\text{max}}} (V_{i,n}/2) [1 + \cos(n\phi_i - \gamma_{i,n})] \\
 & + \sum_{i<j}^{n_{\text{atoms}}} \left( \frac{A_{ij}}{r_{ij}^{12}} - \frac{B_{ij}}{r_{ij}^6} \right) + \sum_{i<j}^{n_{\text{atoms}}} \frac{q_i q_j}{4\pi\epsilon_0 r_{ij}},
 \end{aligned}$$

Where  $V_{\text{AMBER}}$  is potential considered in the computation, and other notations have been followed of Assisted Model Building with Energy Refinement (AMBER) suite code such as:

The meanings of right hand side terms are:

- First term (summing over bonds): represents the energy between covalently bonded atoms. This harmonic (ideal spring) force is a good approximation near the equilibrium bond length, but becomes increasingly poor as atoms separate.
- Second term (summing over angles): represents the energy due to the geometry of electron orbitals involved in covalent bonding.
- Third term (summing over torsions): represents the energy for twisting a bond due to bond order (e.g., double bonds) and neighboring bonds or lone pairs of electrons. One bond may have more than one of these terms, such that the total torsional energy is expressed as a Fourier series.
- Fourth term (double summation over  $i$  and  $j$ ): represents the non-bonded energy between all atom pairs, which can be decomposed into van der Waals (first term of summation) and electrostatic (second term of summation) energies.

DIHE

o2-c-ca-ca 1 3.625 180.0 2.0 from ref. 1. *J. Am. Chem. Soc.* 134, **2012**, 4207-4215.

o2-c-ca-ca 1 **1.055** 180.0 2.0 Developed here by MM fitting as shown in **Figure S7**.

MM stands for Molecular Mechanical Simulations.

Reference 1: Grosch, J. S.; Paesani, F. *J. Am. Chem. Soc.* 134, **2012**, 4207-4215.

In the above line, DIHE: o2-c-ca-ca represent the name of the rotational dihedral angle of the BDC linker,  $V_{i,n} = 3.625$  kcal/mol,  $d = 180.0$ , and  $n = 2$ .

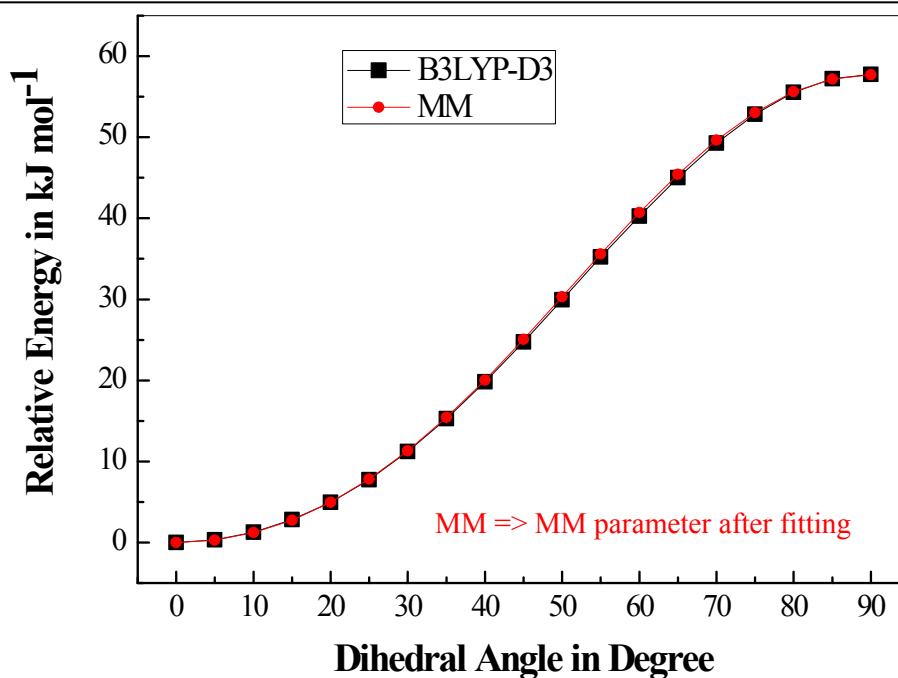

**Figure S7:** PECs of the model  $[\text{Cu}_4(\text{BDC})(\text{HCO}_2)_6(\text{NH}_3)_4]$  MOF containing BDC with fitted force field parameters by MM simulations.

**Optimized Geometry of the Model MOFs with various Linkers Computed at B3LYP-D3 method:**

**1. XYZ Co-ordinate of MOF with BDC Linker:**

|    |             |             |             |
|----|-------------|-------------|-------------|
| Cu | 1.32902400  | 0.00000000  | 0.00000000  |
| Cu | -1.32902400 | 0.00000000  | 0.00000000  |
| Cu | 1.32902400  | 0.00000000  | 10.92641400 |
| Cu | -1.32902400 | 0.00000000  | 10.92641400 |
| N  | 3.51339400  | 0.00000000  | 0.00000000  |
| H  | 3.87936200  | 0.00000000  | 0.95338100  |
| H  | 3.87936200  | 0.82565200  | -0.47669000 |
| H  | 3.87936200  | -0.82565200 | -0.47669000 |
| N  | -3.51339400 | 0.00000000  | 0.00000000  |
| H  | -3.87936200 | 0.00000000  | 0.95338100  |
| H  | -3.87936200 | -0.82565200 | -0.47669000 |
| H  | -3.87936200 | 0.82565200  | -0.47669000 |
| N  | 3.51339400  | 0.00000000  | 10.92641400 |
| H  | 3.87936200  | 0.00000000  | 9.97303400  |
| H  | 3.87936200  | -0.82565200 | 11.40310400 |
| H  | 3.87936200  | 0.82565200  | 11.40310400 |
| N  | -3.51339400 | 0.00000000  | 10.92641400 |
| H  | -3.87936200 | 0.00000000  | 9.97303400  |
| H  | -3.87936200 | 0.82565200  | 11.40310400 |
| H  | -3.87936200 | -0.82565200 | 11.40310400 |
| C  | 0.00000000  | -2.54274700 | 0.00000000  |
| O  | 1.13517000  | -1.99025100 | 0.00000000  |
| O  | -1.13517000 | -1.99025100 | 0.00000000  |
| H  | 0.00000000  | -3.65365100 | 0.00000000  |
| C  | 0.00000000  | 2.54274700  | 0.00000000  |
| O  | 1.13517000  | 1.99025100  | 0.00000000  |
| O  | -1.13517000 | 1.99025100  | 0.00000000  |
| H  | 0.00000000  | 3.65365100  | 0.00000000  |
| C  | 0.00000000  | 2.54274700  | 10.92641400 |
| O  | 1.13517000  | 1.99025100  | 10.92641400 |
| O  | -1.13517000 | 1.99025100  | 10.92641400 |



|   |             |             |             |
|---|-------------|-------------|-------------|
| H | 0.00000000  | 3.65365100  | 10.92641400 |
| C | 0.00000000  | -2.54274700 | 10.92641400 |
| O | 1.13517000  | -1.99025100 | 10.92641400 |
| O | -1.13517000 | -1.99025100 | 10.92641400 |
| H | 0.00000000  | -3.65365100 | 10.92641400 |
| C | 0.00000000  | 0.00000000  | -2.53943500 |
| O | 1.13534600  | 0.00000000  | -1.98729600 |
| O | -1.13534600 | 0.00000000  | -1.98729600 |
| H | 0.00000000  | 0.00000000  | -3.65024600 |
| C | 0.00000000  | 0.00000000  | 13.46585000 |
| O | 1.13534600  | 0.00000000  | 12.91371100 |
| O | -1.13534600 | 0.00000000  | 12.91371100 |
| H | 0.00000000  | 0.00000000  | 14.57666000 |
| C | 0.00000200  | 0.00000000  | 2.55836700  |
| O | 1.13052600  | 0.00000000  | 1.97926700  |
| O | -1.13053200 | 0.00000000  | 1.97927600  |
| C | -0.00000400 | 0.00000000  | 8.36743200  |
| O | 1.13037400  | 0.00000000  | 8.94715400  |
| O | -1.13038700 | 0.00000000  | 8.94714900  |
| C | -0.00000300 | 0.00000000  | 4.05957200  |
| C | -0.00001100 | 0.00000000  | 6.86607000  |
| C | 1.21241500  | 0.00000000  | 4.76625400  |
| C | -1.21242300 | 0.00000000  | 4.76625100  |
| C | 1.21240500  | 0.00000000  | 6.15930600  |
| C | -1.21242500 | 0.00000000  | 6.15930500  |
| H | 2.14676200  | 0.00000000  | 4.20498200  |
| H | -2.14676600 | 0.00000000  | 4.20497200  |
| H | 2.14679100  | 0.00000000  | 6.72056300  |
| H | -2.14682000 | 0.00000000  | 6.72054600  |

## 2. XYZ Co-ordinate of MOF with DFBDC Linker:

|    |             |            |             |
|----|-------------|------------|-------------|
| Cu | 1.33106300  | 0.00000000 | 0.00000000  |
| Cu | -1.33106300 | 0.00000000 | 0.00000000  |
| Cu | 1.33106300  | 0.00000000 | 10.96867100 |
| Cu | -1.33106300 | 0.00000000 | 10.96867100 |
| N  | 3.51320400  | 0.00000000 | 0.00000000  |
| H  | 3.87920200  | 0.00000000 | 0.95345500  |

|   |             |             |             |
|---|-------------|-------------|-------------|
| H | 3.87920200  | 0.82571600  | -0.47672800 |
| H | 3.87920200  | -0.82571600 | -0.47672800 |
| N | -3.51320400 | 0.00000000  | 0.00000000  |
| H | -3.87920200 | 0.00000000  | 0.95345500  |
| H | -3.87920200 | -0.82571600 | -0.47672800 |
| H | -3.87920200 | 0.82571600  | -0.47672800 |
| N | 3.51320400  | 0.00000000  | 10.96867100 |
| H | 3.87920200  | 0.00000000  | 10.01521600 |
| H | 3.87920200  | -0.82571600 | 11.44539800 |
| H | 3.87920200  | 0.82571600  | 11.44539800 |
| N | -3.51320400 | 0.00000000  | 10.96867100 |
| H | -3.87920200 | 0.00000000  | 10.01521600 |
| H | -3.87920200 | 0.82571600  | 11.44539800 |
| H | -3.87920200 | -0.82571600 | 11.44539800 |
| C | 0.00000000  | -2.54183000 | 0.00000000  |
| O | 1.13521400  | -1.98919500 | 0.00000000  |
| O | -1.13521400 | -1.98919500 | 0.00000000  |
| H | 0.00000000  | -3.65275800 | 0.00000000  |
| C | 0.00000000  | 2.54183000  | 0.00000000  |
| O | 1.13521400  | 1.98919500  | 0.00000000  |
| O | -1.13521400 | 1.98919500  | 0.00000000  |
| H | 0.00000000  | 3.65275800  | 0.00000000  |
| C | 0.00000000  | 2.54183000  | 10.96867100 |
| O | 1.13521400  | 1.98919500  | 10.96867100 |
| O | -1.13521400 | 1.98919500  | 10.96867100 |
| H | 0.00000000  | 3.65275800  | 10.96867100 |
| C | 0.00000000  | -2.54183000 | 10.96867100 |
| O | 1.13521400  | -1.98919500 | 10.96867100 |
| O | -1.13521400 | -1.98919500 | 10.96867100 |
| H | 0.00000000  | -3.65275800 | 10.96867100 |
| C | 0.00000000  | 0.00000000  | -2.53945700 |
| O | 1.13533400  | 0.00000000  | -1.98720000 |
| O | -1.13533400 | 0.00000000  | -1.98720000 |
| H | 0.00000000  | 0.00000000  | -3.65030800 |
| C | 0.00000000  | 0.00000000  | 13.50812700 |
| O | 1.13533400  | 0.00000000  | 12.95587100 |
| O | -1.13533400 | 0.00000000  | 12.95587100 |
| H | 0.00000000  | 0.00000000  | 14.61897800 |

|   |             |            |            |
|---|-------------|------------|------------|
| C | 0.03018900  | 0.00000000 | 2.55565800 |
| O | 1.14941200  | 0.00000000 | 1.96701200 |
| O | -1.10983100 | 0.00000000 | 1.99618700 |
| C | -0.02970700 | 0.00000000 | 8.41213600 |
| O | 1.11011900  | 0.00000000 | 8.97245200 |
| O | -1.14873300 | 0.00000000 | 9.00133200 |
| C | 0.04440500  | 0.00000000 | 4.05954200 |
| C | -0.04360300 | 0.00000000 | 6.90841400 |
| C | 1.22012400  | 0.00000000 | 4.83043100 |
| C | -1.17548900 | 0.00000000 | 4.75004000 |
| C | 1.17632600  | 0.00000000 | 6.21805800 |
| C | -1.21921800 | 0.00000000 | 6.13767900 |
| F | 2.43801000  | 0.00000000 | 4.25845700 |
| H | -2.10539500 | 0.00000000 | 4.18383700 |
| H | 2.10637300  | 0.00000000 | 6.78408200 |
| F | -2.43702600 | 0.00000000 | 6.70987900 |

### 3. XYZ Co-ordinate of MOF with DMBDC Linker:

|    |             |             |             |
|----|-------------|-------------|-------------|
| Cu | 1.32795700  | 0.00000000  | 0.00000000  |
| Cu | -1.32795700 | 0.00000000  | 0.00000000  |
| Cu | 1.32795700  | 0.00000000  | 10.94459600 |
| Cu | -1.32795700 | 0.00000000  | 10.94459600 |
| N  | 3.51161900  | 0.00000000  | 0.00000000  |
| H  | 3.87760900  | 0.00000000  | 0.95343600  |
| H  | 3.87760900  | 0.82569900  | -0.47671800 |
| H  | 3.87760900  | -0.82569900 | -0.47671800 |
| N  | -3.51161900 | 0.00000000  | 0.00000000  |
| H  | -3.87760900 | 0.00000000  | 0.95343600  |
| H  | -3.87760900 | -0.82569900 | -0.47671800 |
| H  | -3.87760900 | 0.82569900  | -0.47671800 |
| N  | 3.51161900  | 0.00000000  | 10.94459600 |
| H  | 3.87760900  | 0.00000000  | 9.99116100  |
| H  | 3.87760900  | -0.82569900 | 11.42131400 |
| H  | 3.87760900  | 0.82569900  | 11.42131400 |

|   |             |             |             |
|---|-------------|-------------|-------------|
| N | -3.51161900 | 0.00000000  | 10.94459600 |
| H | -3.87760900 | 0.00000000  | 9.99116100  |
| H | -3.87760900 | 0.82569900  | 11.42131400 |
| H | -3.87760900 | -0.82569900 | 11.42131400 |
| C | 0.00000000  | -2.54476100 | 0.00000000  |
| O | 1.13515100  | -1.99223900 | 0.00000000  |
| O | -1.13515100 | -1.99223900 | 0.00000000  |
| H | 0.00000000  | -3.65580900 | 0.00000000  |
| C | 0.00000000  | 2.54476100  | 0.00000000  |
| O | 1.13515100  | 1.99223900  | 0.00000000  |
| O | -1.13515100 | 1.99223900  | 0.00000000  |
| H | 0.00000000  | 3.65580900  | 0.00000000  |
| C | 0.00000000  | 2.54476100  | 10.94459600 |
| O | 1.13515100  | 1.99223900  | 10.94459600 |
| O | -1.13515100 | 1.99223900  | 10.94459600 |
| H | 0.00000000  | 3.65580900  | 10.94459600 |
| C | 0.00000000  | -2.54476100 | 10.94459600 |
| O | 1.13515100  | -1.99223900 | 10.94459600 |
| O | -1.13515100 | -1.99223900 | 10.94459600 |
| H | 0.00000000  | -3.65580900 | 10.94459600 |
| C | 0.00000000  | 0.00000000  | -2.54049600 |
| O | 1.13537400  | 0.00000000  | -1.98822800 |
| O | -1.13537400 | 0.00000000  | -1.98822800 |
| H | 0.00000000  | 0.00000000  | -3.65146200 |
| C | 0.00000000  | 0.00000000  | 13.48509200 |
| O | 1.13537400  | 0.00000000  | 12.93282500 |
| O | -1.13537400 | 0.00000000  | 12.93282500 |
| H | 0.00000000  | 0.00000000  | 14.59605800 |
| C | -0.01931600 | 0.00000000  | 2.55244600  |
| O | 1.12451300  | 0.00000000  | 1.99909600  |
| O | -1.13315300 | 0.00000000  | 1.94857200  |
| C | -0.00985100 | 0.00000000  | 8.38939100  |
| O | 1.13207600  | 0.00000000  | 8.94726500  |
| O | -1.12523500 | 0.00000000  | 8.99050800  |
| C | -0.05964800 | 0.00000000  | 4.05396900  |
| C | -0.04049400 | 0.00000000  | 6.88700400  |
| C | 1.03351400  | 0.51853800  | 4.77052100  |
| C | -1.16145600 | -0.50462200 | 4.77066900  |

|   |             |             |            |
|---|-------------|-------------|------------|
| C | 1.04642000  | 0.51363500  | 6.16095500 |
| C | -1.14831500 | -0.50976900 | 6.18141700 |
| H | 1.87995200  | 0.90877300  | 4.20523200 |
| O | -2.29811100 | -0.98392800 | 4.17252000 |
| H | 1.89936200  | 0.90556800  | 6.71537000 |
| O | -2.17861900 | -1.15037100 | 6.81829200 |
| C | -2.20762300 | -2.33122100 | 3.70413000 |
| H | -1.91239800 | -3.00629700 | 4.52355500 |
| H | -3.21581400 | -2.60175400 | 3.35099300 |
| H | -1.50462400 | -2.40979100 | 2.85916700 |
| C | -3.36223000 | -0.36647700 | 6.98367300 |
| H | -3.15295800 | 0.52484600  | 7.59693500 |
| H | -4.08625900 | -1.01074500 | 7.50811900 |
| H | -3.78065600 | -0.07132900 | 6.00789100 |

#### 4. XYZ Co-ordinate of MOF with TFBDC Linker:

|    |             |             |             |
|----|-------------|-------------|-------------|
| Cu | 1.33431600  | 0.00000000  | 0.00000000  |
| Cu | -1.33431600 | 0.00000000  | 0.00000000  |
| Cu | 1.33431600  | 0.00000000  | 10.93231700 |
| Cu | -1.33431600 | 0.00000000  | 10.93231700 |
| N  | 3.52691800  | 0.00000000  | 0.00000000  |
| H  | 3.89285100  | 0.00000000  | 0.95328900  |
| H  | 3.89285100  | 0.82557200  | -0.47664400 |
| H  | 3.89285100  | -0.82557200 | -0.47664400 |
| N  | -3.52691800 | 0.00000000  | 0.00000000  |
| H  | -3.89285100 | 0.00000000  | 0.95328900  |
| H  | -3.89285100 | -0.82557200 | -0.47664400 |
| H  | -3.89285100 | 0.82557200  | -0.47664400 |
| N  | 3.52691800  | 0.00000000  | 10.93231700 |
| H  | 3.89285100  | 0.00000000  | 9.97902800  |
| H  | 3.89285100  | -0.82557200 | 11.40896100 |
| H  | 3.89285100  | 0.82557200  | 11.40896100 |
| N  | -3.52691800 | 0.00000000  | 10.93231700 |
| H  | -3.89285100 | 0.00000000  | 9.97902800  |
| H  | -3.89285100 | 0.82557200  | 11.40896100 |
| H  | -3.89285100 | -0.82557200 | 11.40896100 |

|   |             |             |             |
|---|-------------|-------------|-------------|
| C | 0.00000000  | -2.53653900 | 0.00000000  |
| O | 1.13937600  | -1.99876400 | 0.00000000  |
| O | -1.13937600 | -1.99876400 | 0.00000000  |
| H | 0.00000000  | -3.64748800 | 0.00000000  |
| C | 0.00000000  | 2.53653900  | 0.00000000  |
| O | 1.13937600  | 1.99876400  | 0.00000000  |
| O | -1.13937600 | 1.99876400  | 0.00000000  |
| H | 0.00000000  | 3.64748800  | 0.00000000  |
| C | 0.00000000  | 2.53653900  | 10.93231700 |
| O | 1.13937600  | 1.99876400  | 10.93231700 |
| O | -1.13937600 | 1.99876400  | 10.93231700 |
| H | 0.00000000  | 3.64748800  | 10.93231700 |
| C | 0.00000000  | -2.53653900 | 10.93231700 |
| O | 1.13937600  | -1.99876400 | 10.93231700 |
| O | -1.13937600 | -1.99876400 | 10.93231700 |
| H | 0.00000000  | -3.64748800 | 10.93231700 |
| C | 0.00000000  | 0.00000000  | -2.53226700 |
| O | 1.13929900  | 0.00000000  | -1.99476800 |
| O | -1.13929900 | 0.00000000  | -1.99476800 |
| H | 0.00000000  | 0.00000000  | -3.64310500 |
| C | 0.00000000  | 0.00000000  | 13.46458400 |
| O | 1.13929900  | 0.00000000  | 12.92708500 |
| O | -1.13929900 | 0.00000000  | 12.92708500 |
| H | 0.00000000  | 0.00000000  | 14.57542200 |
| C | 0.00000700  | 0.00000000  | 2.54179000  |
| O | 1.13558800  | 0.00000000  | 1.99256200  |
| O | -1.13558500 | 0.00000000  | 1.99257400  |
| C | 0.00000300  | 0.00000000  | 8.39033700  |
| O | 1.13555800  | 0.00000000  | 8.93965800  |
| O | -1.13556300 | 0.00000000  | 8.93964300  |
| C | -0.00002700 | 0.00000000  | 4.04823400  |
| C | -0.00002400 | 0.00000000  | 6.88398800  |
| C | 0.82351700  | 0.87051300  | 4.76914800  |
| C | -0.82358800 | -0.87049700 | 4.76914600  |
| C | 0.82351900  | 0.87050900  | 6.16314000  |
| C | -0.82358000 | -0.87049600 | 6.16314000  |
| F | 1.60979700  | 1.74871100  | 4.13093000  |
| F | -1.60988500 | -1.74868300 | 4.13093300  |

|   |             |             |            |
|---|-------------|-------------|------------|
| F | 1.60971700  | 1.74871700  | 6.80137200 |
| F | -1.60978900 | -1.74869200 | 6.80137600 |

### 5. XYZ Co-ordinate of MOF with NDC Linker:

|    |             |             |             |
|----|-------------|-------------|-------------|
| Cu | 1.32925300  | 0.00000000  | 0.00000000  |
| Cu | -1.32925300 | 0.00000000  | 0.00000000  |
| Cu | 1.32925300  | 0.00000000  | 10.93638500 |
| Cu | -1.32925300 | 0.00000000  | 10.93638500 |
| N  | 3.51287400  | 0.00000000  | 0.00000000  |
| H  | 3.87886700  | 0.00000000  | 0.95344600  |
| H  | 3.87886700  | 0.82570800  | -0.47672300 |
| H  | 3.87886700  | -0.82570800 | -0.47672300 |
| N  | -3.51287400 | 0.00000000  | 0.00000000  |
| H  | -3.87886700 | 0.00000000  | 0.95344600  |
| H  | -3.87886700 | -0.82570800 | -0.47672300 |
| H  | -3.87886700 | 0.82570800  | -0.47672300 |
| N  | 3.51287400  | 0.00000000  | 10.93638500 |
| H  | 3.87886700  | 0.00000000  | 9.98294000  |
| H  | 3.87886700  | -0.82570800 | 11.41310800 |
| H  | 3.87886700  | 0.82570800  | 11.41310800 |
| N  | -3.51287400 | 0.00000000  | 10.93638500 |
| H  | -3.87886700 | 0.00000000  | 9.98294000  |
| H  | -3.87886700 | 0.82570800  | 11.41310800 |
| H  | -3.87886700 | -0.82570800 | 11.41310800 |
| C  | 0.00000000  | -2.54480700 | 0.00000000  |
| O  | 1.13512600  | -1.99200600 | 0.00000000  |
| O  | -1.13512600 | -1.99200600 | 0.00000000  |
| H  | 0.00000000  | -3.65578100 | 0.00000000  |
| C  | 0.00000000  | 2.54480700  | 0.00000000  |
| O  | 1.13512600  | 1.99200600  | 0.00000000  |
| O  | -1.13512600 | 1.99200600  | 0.00000000  |
| H  | 0.00000000  | 3.65578100  | 0.00000000  |
| C  | 0.00000000  | 2.54480700  | 10.93638500 |
| O  | 1.13512600  | 1.99200600  | 10.93638500 |
| O  | -1.13512600 | 1.99200600  | 10.93638500 |
| H  | 0.00000000  | 3.65578100  | 10.93638500 |
| C  | 0.00000000  | -2.54480700 | 10.93638500 |

|   |             |             |             |
|---|-------------|-------------|-------------|
| O | 1.13512600  | -1.99200600 | 10.93638500 |
| O | -1.13512600 | -1.99200600 | 10.93638500 |
| H | 0.00000000  | -3.65578100 | 10.93638500 |
| C | 0.00000000  | 0.00000000  | -2.53977600 |
| O | 1.13539600  | 0.00000000  | -1.98751100 |
| O | -1.13539600 | 0.00000000  | -1.98751100 |
| H | 0.00000000  | 0.00000000  | -3.65064700 |
| C | 0.00000000  | 0.00000000  | 13.47616200 |
| O | 1.13539600  | 0.00000000  | 12.92389600 |
| O | -1.13539600 | 0.00000000  | 12.92389600 |
| H | 0.00000000  | 0.00000000  | 14.58703200 |
| C | 0.00589800  | 0.00000000  | 2.55391900  |
| O | 1.12652100  | 0.00000000  | 1.95664400  |
| O | -1.13256500 | 0.00000000  | 1.99499500  |
| C | 0.00553100  | 0.00000000  | 8.38305800  |
| O | 1.12634400  | 0.00000000  | 8.97975100  |
| O | -1.13307000 | 0.00000000  | 8.94110700  |
| C | 0.04224700  | 0.00000000  | 4.05603500  |
| C | 0.04208600  | 0.00000000  | 6.88087000  |
| C | 0.92562700  | 0.89759300  | 4.74961100  |
| C | -0.77409100 | -0.86322500 | 4.76184700  |
| C | 0.92557700  | 0.89761500  | 6.18764300  |
| C | -0.77417200 | -0.86324100 | 6.17500000  |
| H | -1.43995800 | -1.53176100 | 4.21372800  |
| H | -1.44023000 | -1.53154400 | 6.72313300  |
| C | 1.74838400  | 1.84545500  | 6.87021800  |
| C | 1.74831900  | 1.84565900  | 4.06715300  |
| C | 2.53455700  | 2.73787700  | 4.76166400  |
| C | 2.53464500  | 2.73771700  | 6.17581000  |
| H | 1.74345400  | 1.86742000  | 7.95721400  |
| H | 1.74314300  | 1.86808100  | 2.98017800  |
| H | 3.14915500  | 3.45713400  | 4.21508800  |
| H | 3.14942200  | 3.45675600  | 6.72247000  |

Vibrational Frequency Analysis:

(a) The vibrational modes and harmonic frequencies of the model MOF containing BDC linker.

Vibrational Modes                      Frequencies (cm<sup>-1</sup>)



|    |           |
|----|-----------|
| 1  | 1.9146    |
| 2  | 32.9121   |
| 3  | 49.0065   |
| 4  | 49.7701   |
| 5  | 54.9076   |
| 6  | 60.3082   |
| 7  | 66.2870   |
| 8  | 75.2869   |
| 9  | 118.0470  |
| 10 | 121.1001  |
| 11 | 149.0416  |
| 12 | 169.8780  |
| 13 | 209.9438  |
| 14 | 224.4611  |
| 15 | 227.4735  |
| 16 | 275.4106  |
| 17 | 301.6715  |
| 18 | 314.1149  |
| 19 | 326.6019  |
| 20 | 348.0385  |
| 21 | 371.8582  |
| 22 | 376.1638  |
| 23 | 386.2538  |
| 24 | 392.7503  |
| 25 | 482.4795  |
| 26 | 511.9815  |
| 27 | 515.3900  |
| 28 | 579.4796  |
| 29 | 644.7674  |
| 30 | 749.2860  |
| 31 | 772.7939  |
| 32 | 787.3507  |
| 33 | 868.2204  |
| 34 | 1005.3252 |
| 35 | 1042.3753 |
| 36 | 1045.2941 |
| 37 | 1116.9388 |
| 38 | 1119.4026 |

|    |           |
|----|-----------|
| 39 | 1170.0096 |
| 40 | 1366.5942 |
| 41 | 1370.6866 |
| 42 | 1372.8462 |
| 43 | 1375.9614 |
| 44 | 1380.8472 |
| 45 | 1448.1071 |
| 46 | 1567.2012 |
| 47 | 1611.7495 |
| 48 | 1632.2965 |
| 49 | 1634.7528 |
| 50 | 1636.4624 |
| 51 | 1705.4001 |
| 52 | 2999.3772 |
| 53 | 3001.9525 |
| 54 | 3206.9761 |
| 55 | 3460.4530 |
| 56 | 3460.5365 |
| 57 | 3589.5230 |
| 58 | 3590.5354 |

(b) The vibrational modes and harmonic frequencies of the model MOF containing DFBDC linker.

| Vibrational Modes | Frequencies (cm <sup>-1</sup> ) |
|-------------------|---------------------------------|
| 1                 | 3.3783                          |
| 2                 | 22.6156                         |
| 3                 | 42.4358                         |
| 4                 | 47.0193                         |
| 5                 | 54.3191                         |
| 6                 | 62.8118                         |
| 7                 | 64.6415                         |
| 8                 | 72.3761                         |
| 9                 | 117.0220                        |
| 10                | 120.4465                        |
| 11                | 149.2457                        |
| 12                | 160.4245                        |
| 13                | 193.1414                        |
| 14                | 215.6550                        |

|    |           |
|----|-----------|
| 15 | 226.5953  |
| 16 | 244.7659  |
| 17 | 274.6916  |
| 18 | 311.4176  |
| 19 | 320.5871  |
| 20 | 326.1424  |
| 21 | 352.9882  |
| 22 | 371.3575  |
| 23 | 376.8454  |
| 24 | 388.2369  |
| 25 | 410.1102  |
| 26 | 480.8292  |
| 27 | 509.5619  |
| 28 | 516.4852  |
| 29 | 525.0146  |
| 30 | 618.5938  |
| 31 | 722.4687  |
| 32 | 772.6331  |
| 33 | 785.9334  |
| 34 | 813.0693  |
| 35 | 914.5764  |
| 36 | 1043.3531 |
| 37 | 1045.9072 |
| 38 | 1119.8295 |
| 39 | 1122.3029 |
| 40 | 1226.1266 |
| 41 | 1369.4269 |
| 42 | 1371.3323 |
| 43 | 1373.4980 |
| 44 | 1377.3654 |
| 45 | 1396.7508 |
| 46 | 1522.1263 |
| 47 | 1595.4181 |
| 48 | 1611.2152 |
| 49 | 1632.1761 |
| 50 | 1636.1929 |
| 51 | 1637.4461 |
| 52 | 1712.3088 |

|    |           |
|----|-----------|
| 53 | 3000.5634 |
| 54 | 3003.4364 |
| 55 | 3459.6012 |
| 56 | 3459.9126 |
| 57 | 3588.4948 |
| 58 | 3589.3118 |

(c) The vibrational modes and harmonic frequencies of the model MOF containing DMBDC linker.

| Vibrational Modes | Frequencies (cm <sup>-1</sup> ) |
|-------------------|---------------------------------|
| 1                 | 7.7127                          |
| 2                 | 32.9492                         |
| 3                 | 42.6514                         |
| 4                 | 51.8669                         |
| 5                 | 58.2950                         |
| 6                 | 63.4552                         |
| 7                 | 67.5129                         |
| 8                 | 78.9103                         |
| 9                 | 115.7874                        |
| 10                | 124.2364                        |
| 11                | 147.0929                        |
| 12                | 162.3490                        |
| 13                | 173.7189                        |
| 14                | 200.5901                        |
| 15                | 215.0767                        |
| 16                | 227.0117                        |
| 17                | 244.9998                        |
| 18                | 278.4616                        |
| 19                | 310.3118                        |
| 20                | 317.7934                        |
| 21                | 325.5431                        |
| 22                | 347.3406                        |
| 23                | 370.5713                        |
| 24                | 374.6728                        |
| 25                | 386.8521                        |
| 26                | 390.1334                        |
| 27                | 475.4199                        |
| 28                | 505.2338                        |

|    |           |
|----|-----------|
| 29 | 513.3564  |
| 30 | 522.0079  |
| 31 | 604.4166  |
| 32 | 688.6223  |
| 33 | 772.3418  |
| 34 | 780.8822  |
| 35 | 799.2841  |
| 36 | 881.1792  |
| 37 | 997.3998  |
| 38 | 1044.6684 |
| 39 | 1046.5298 |
| 40 | 1116.1188 |
| 41 | 1119.5114 |
| 42 | 1171.8057 |
| 43 | 1225.4702 |
| 44 | 1329.7492 |
| 45 | 1370.5151 |
| 46 | 1372.7702 |
| 47 | 1375.6373 |
| 48 | 1380.4822 |
| 49 | 1441.6773 |
| 50 | 1463.1824 |
| 51 | 1476.9167 |
| 52 | 1570.3999 |
| 53 | 1611.6571 |
| 54 | 1632.1526 |
| 55 | 1633.0907 |
| 56 | 1636.4949 |
| 57 | 1704.9799 |
| 58 | 2997.7824 |
| 59 | 3000.3112 |
| 60 | 3012.6975 |
| 61 | 3102.7910 |
| 62 | 3224.2736 |
| 63 | 3460.2050 |
| 64 | 3589.1549 |
| 65 | 3589.9362 |
| 66 | 3590.2306 |

(d) The vibrational modes and harmonic frequencies of the model MOF containing TFBDC linker.

| Vibrational Modes | Frequencies (cm <sup>-1</sup> ) |
|-------------------|---------------------------------|
| 1                 | 8.7817                          |
| 2                 | 18.6142                         |
| 3                 | 31.0667                         |
| 4                 | 46.1061                         |
| 5                 | 49.8991                         |
| 6                 | 60.5201                         |
| 7                 | 69.5034                         |
| 8                 | 73.6036                         |
| 9                 | 108.1542                        |
| 10                | 115.3211                        |
| 11                | 131.0364                        |
| 12                | 145.6506                        |
| 13                | 156.3705                        |
| 14                | 181.2445                        |
| 15                | 206.1765                        |
| 16                | 209.3355                        |
| 17                | 228.1686                        |
| 18                | 269.7781                        |
| 19                | 292.2135                        |
| 20                | 312.5602                        |
| 21                | 339.1246                        |
| 22                | 344.8675                        |
| 23                | 356.3995                        |
| 24                | 364.8792                        |
| 25                | 407.6008                        |
| 26                | 417.4667                        |
| 27                | 441.4075                        |
| 28                | 490.9623                        |
| 29                | 496.7338                        |
| 30                | 502.8308                        |
| 31                | 522.1794                        |
| 32                | 674.1766                        |
| 33                | 769.5346                        |
| 34                | 772.9293                        |

|    |           |
|----|-----------|
| 35 | 789.7954  |
| 36 | 926.7824  |
| 37 | 1020.4194 |
| 38 | 1022.6127 |
| 39 | 1105.9376 |
| 40 | 1108.2471 |
| 41 | 1326.4343 |
| 42 | 1329.1452 |
| 43 | 1341.4249 |
| 44 | 1350.4234 |
| 45 | 1353.6191 |
| 46 | 1428.4373 |
| 47 | 1540.2635 |
| 48 | 1561.8914 |
| 49 | 1606.9590 |
| 50 | 1632.9483 |
| 51 | 1636.9913 |
| 52 | 1637.3088 |
| 53 | 3000.6878 |
| 54 | 3001.3427 |
| 55 | 3460.0818 |
| 56 | 3460.1009 |
| 57 | 3590.1798 |
| 58 | 3590.9893 |

(e) The vibrational modes and harmonic frequencies of the model MOF containing NDC linker.

| Vibrational Modes | Frequencies (cm <sup>-1</sup> ) |
|-------------------|---------------------------------|
| 1                 | 10.2180                         |
| 2                 | 31.1956                         |
| 3                 | 48.5214                         |
| 4                 | 52.8688                         |
| 5                 | 60.6010                         |
| 6                 | 65.1771                         |
| 7                 | 74.2034                         |
| 8                 | 77.0792                         |
| 9                 | 116.9288                        |
| 10                | 130.5930                        |

|    |           |
|----|-----------|
| 11 | 148.3225  |
| 12 | 167.5777  |
| 13 | 197.7477  |
| 14 | 221.2189  |
| 15 | 227.1890  |
| 16 | 245.4394  |
| 17 | 275.4246  |
| 18 | 310.7241  |
| 19 | 320.3260  |
| 20 | 327.0482  |
| 21 | 351.7287  |
| 22 | 371.3491  |
| 23 | 378.9831  |
| 24 | 388.4048  |
| 25 | 440.5469  |
| 26 | 480.0893  |
| 27 | 508.3451  |
| 28 | 515.5014  |
| 29 | 522.7197  |
| 30 | 598.0089  |
| 31 | 683.4265  |
| 32 | 772.1791  |
| 33 | 784.1376  |
| 34 | 796.8125  |
| 35 | 827.8368  |
| 36 | 902.9738  |
| 37 | 999.6505  |
| 38 | 1042.6182 |
| 39 | 1045.5274 |
| 40 | 1070.1920 |
| 41 | 1120.2474 |
| 42 | 1183.8430 |
| 43 | 1229.0121 |
| 44 | 1369.4542 |
| 45 | 1371.5086 |
| 46 | 1373.4397 |
| 47 | 1377.1917 |
| 48 | 1389.6332 |



|    |           |
|----|-----------|
| 49 | 1444.5078 |
| 50 | 1554.0686 |
| 51 | 1596.1906 |
| 52 | 1611.5891 |
| 53 | 1632.4551 |
| 54 | 1636.5914 |
| 55 | 1636.9833 |
| 56 | 1702.8567 |
| 57 | 2998.7868 |
| 58 | 3001.4482 |
| 59 | 3186.6548 |
| 60 | 3235.7082 |
| 61 | 3459.6803 |
| 62 | 3588.4536 |
| 63 | 3588.7014 |
| 64 | 3589.6549 |
